# Supplementary material
Source: Springer Nature journal article supplement (https://www.springermedizin.de/resource/supplementary/13054_2013_2871_MOESM5_ESM.pdf/9714018)

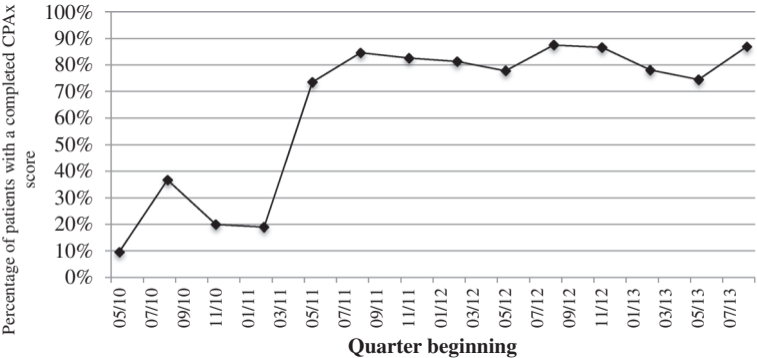

Supplement: MOESM5 [file 9714018]
